# Supplementary material
Source: PubMed Central journal article supplement (PMC3075038)

**N-cadherin**

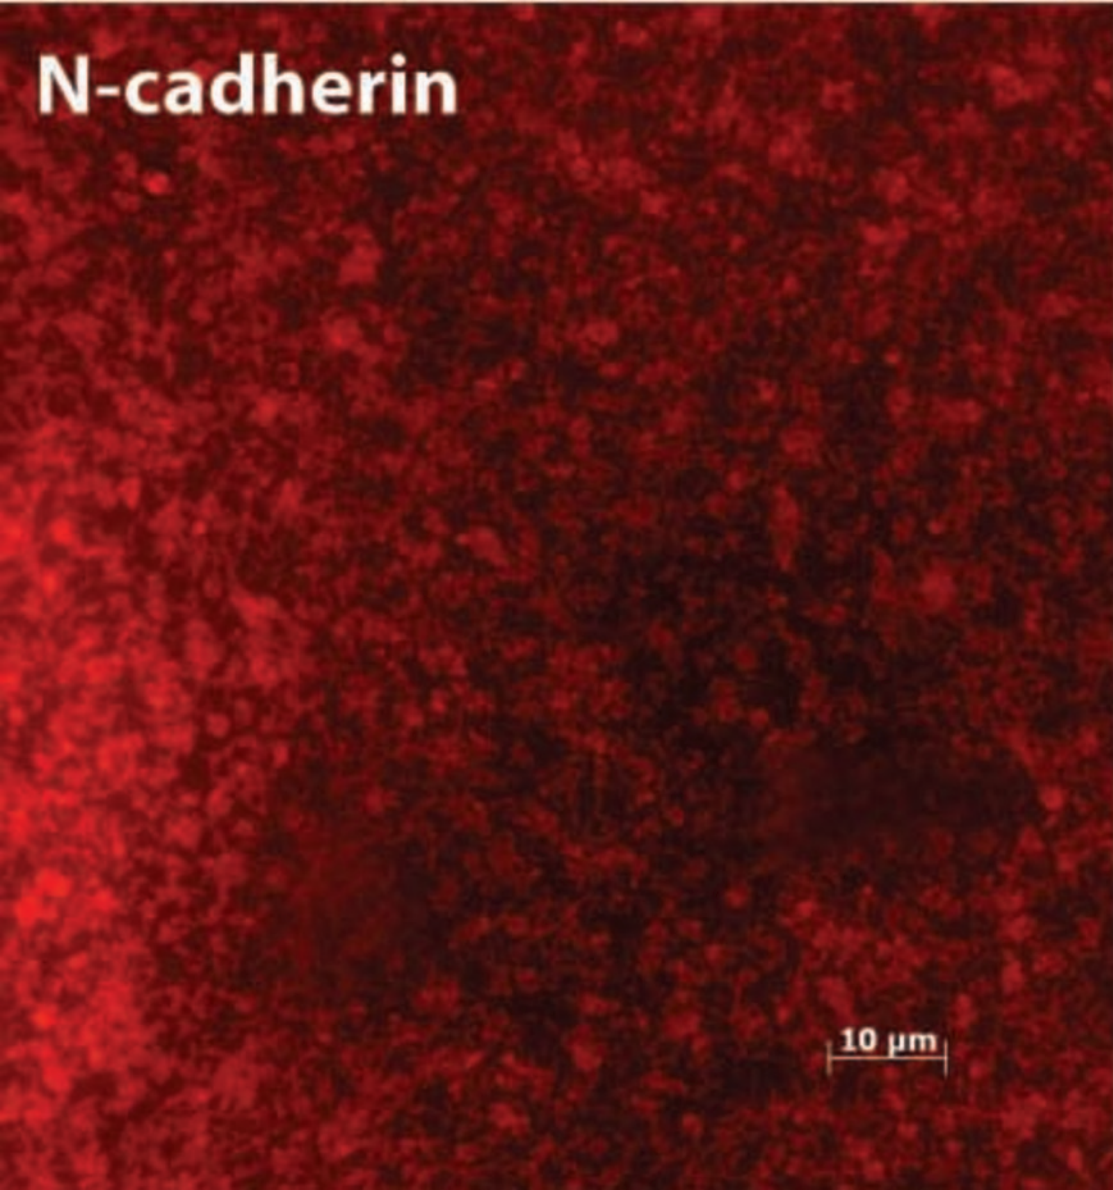

**Fibronectin**

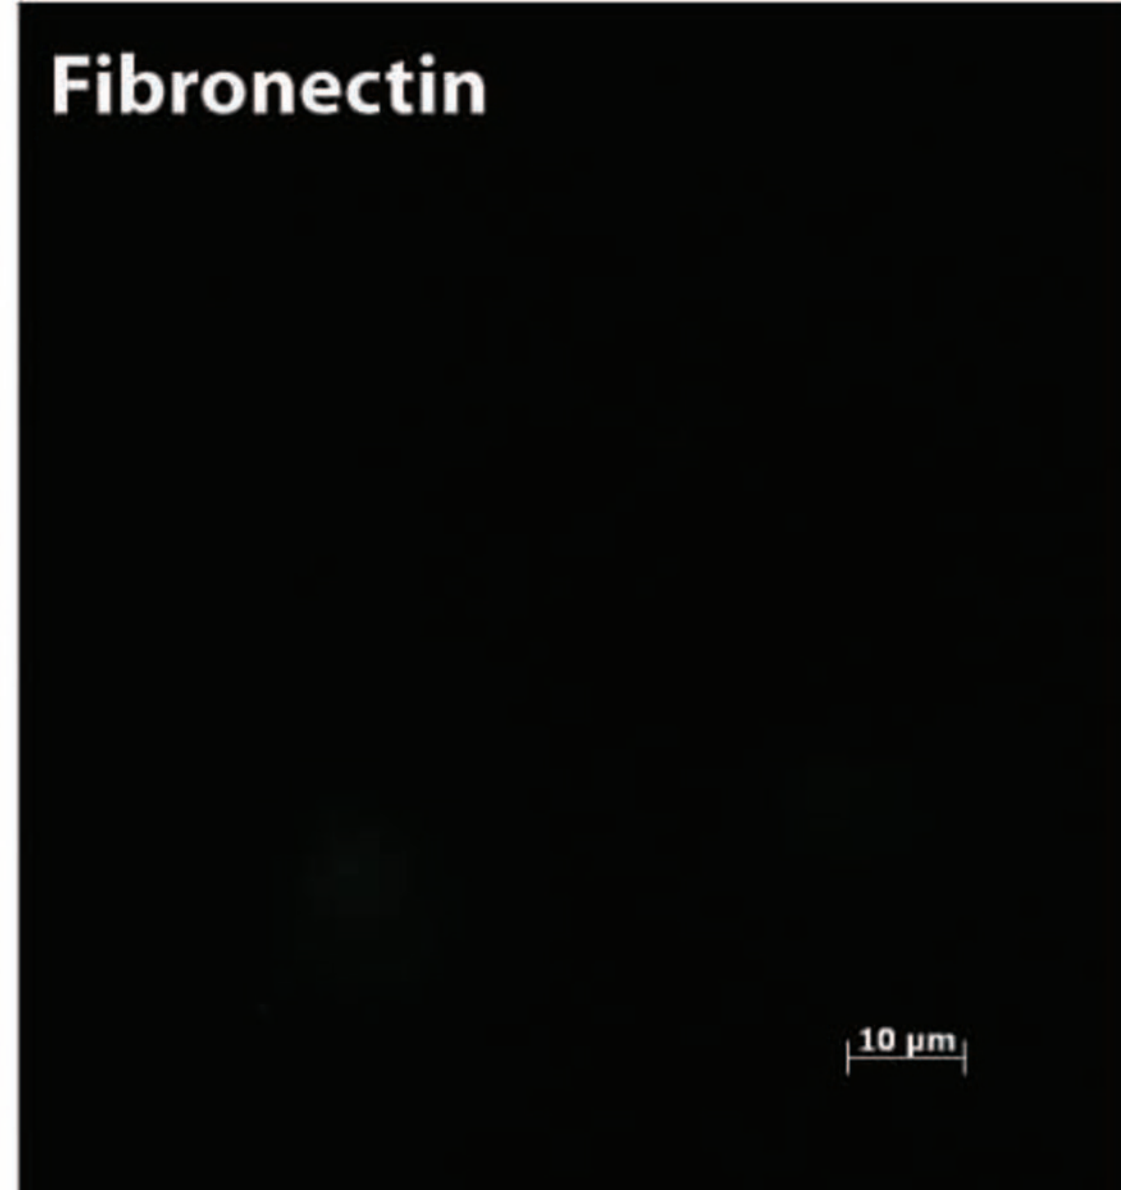

**Merge + BBZ**

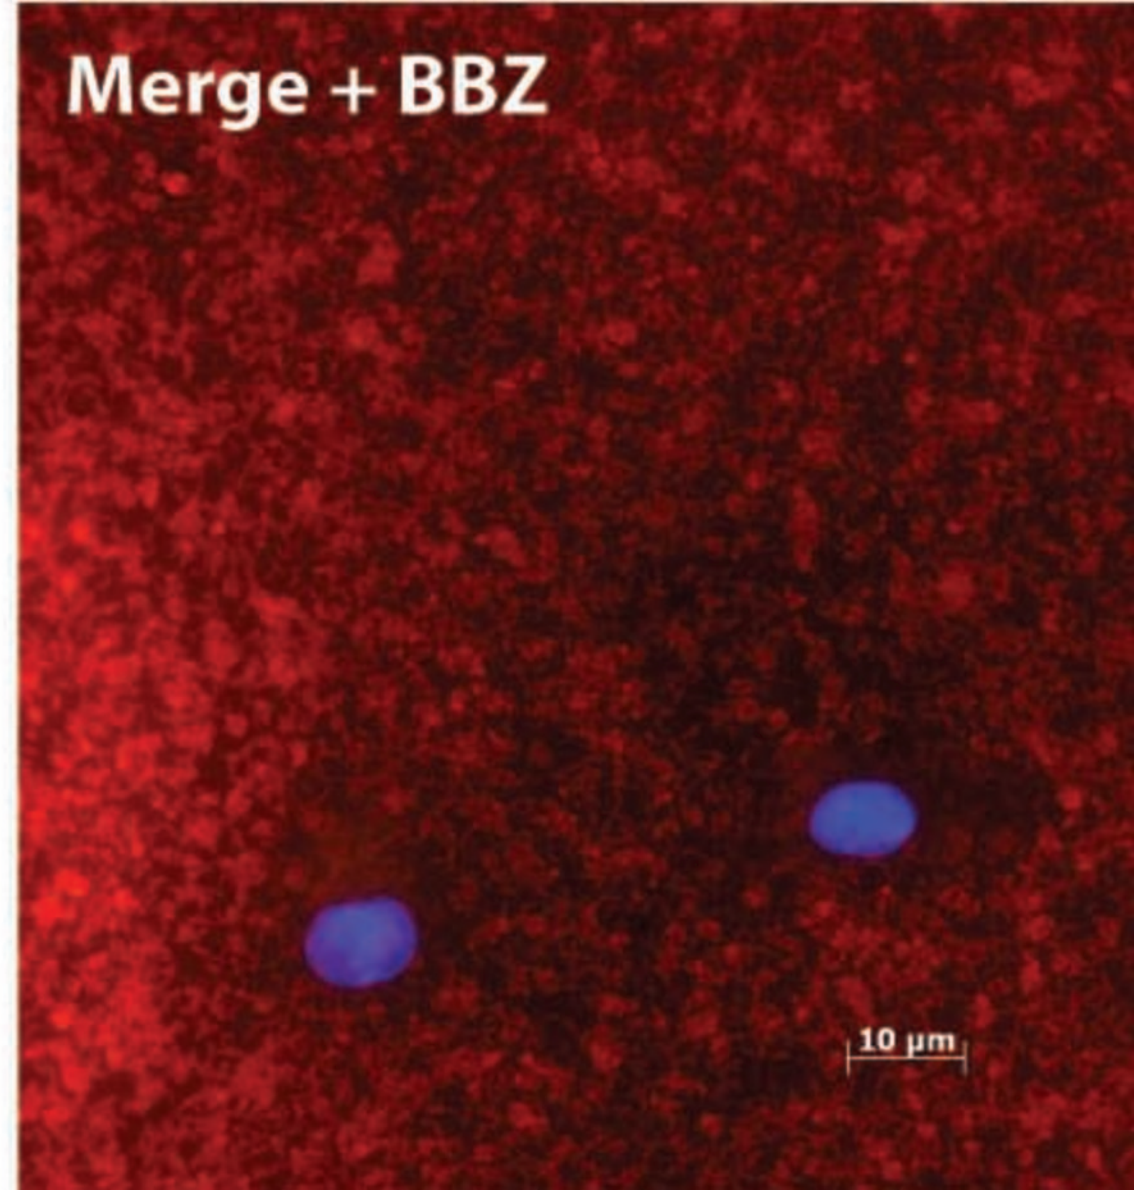

Supplement: supp_00515.2010_figS4.pdf [file supp_00515.2010_figS4.pdf]
